# Supplementary material for: Adapting global evidence-based practice guidelines to the Egyptian healthcare context: the Egyptian Pediatric Clinical Practice Guidelines Committee (EPG) initiative
Source: Springer Nature journal article supplement (doi:10.1186/s42269-023-01059-0), 2023-06-13
Supplement: MOESM1 [file 42269_2023_1059_MOESM1_ESM.pdf]

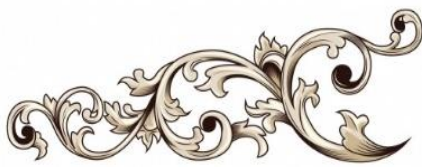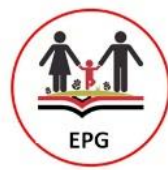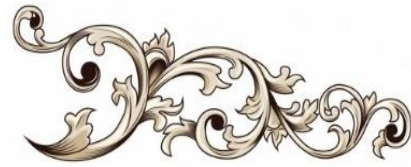

## Recognition and Honor List

The authors wish to send their highest regards in recognition and acknowledgment to the outstanding and lasting contributions to the [Egyptian Pediatric Clinical Practice Guidelines Committee \(EPG\)](#) Initiative from the following members of the EPG Clinical Practice Guideline Adaptation and External Review Groups representing senior pediatricians and faculty staff of Departments of Pediatrics, Faculties of Medicine of Egyptian Universities, University Hospitals, National Research Centre, Armed Forces College of Medicine, Ministry of Health and Population, Health Insurance Organization in addition to the relevant national and international notable topic experts and contributors.

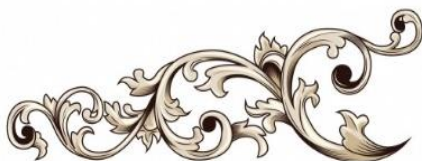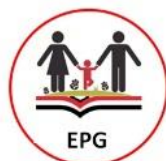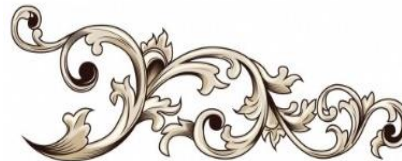

## Contents

|                                                                          |    |
|--------------------------------------------------------------------------|----|
| Members, Guideline Adaptation Groups/ Pediatric Subspecialty Groups..... | 3  |
| Allergy, Immunology, and Rheumatology.....                               | 3  |
| Cardiology.....                                                          | 5  |
| Clinical Nutrition .....                                                 | 6  |
| Critical Care and Emergency Medicine .....                               | 7  |
| Endocrinology.....                                                       | 8  |
| Gastroenterology.....                                                    | 10 |
| Hematology.....                                                          | 12 |
| Neonatology.....                                                         | 14 |
| Nephrology .....                                                         | 16 |
| Neurology .....                                                          | 18 |
| National .....                                                           | 18 |
| International.....                                                       | 19 |
| Pulmonology .....                                                        | 19 |
| Additional Contributors ( <i>other than Pediatrics</i> ).....            | 21 |
| Members, Guideline Methodology Supervision Group.....                    | 22 |
| Members, External Review Groups.....                                     | 22 |
| Clinical Content Reviewers.....                                          | 22 |
| Allergy, Immunology and Rheumatology .....                               | 22 |
| Cardiology .....                                                         | 23 |
| Critical Care/ Emergency Medicine.....                                   | 23 |
| Endocrinology.....                                                       | 24 |
| Gastroenterology.....                                                    | 24 |
| Hematology .....                                                         | 25 |
| Neonatology.....                                                         | 26 |
| Nephrology .....                                                         | 26 |
| Neurology .....                                                          | 27 |
| Pulmonology.....                                                         | 27 |
| Additional Contributors ( <i>other than Pediatrics</i> ).....            | 28 |
| Methodology Reviewer.....                                                | 28 |
| EPG Group Photos .....                                                   | 29 |

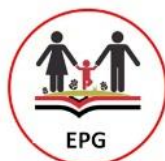

## Members, Guideline Adaptation Groups/ Pediatric Subspecialty Groups

(Each group is arranged in alphabetical order)

### Allergy, Immunology, and Rheumatology

- Prof. Ashraf Abdel Baky (*Lead*)  
Department of Pediatrics, Ain Shams University (ASU)  
Department of Pediatrics, Armed Forces College of Medicine (AFCM)  
Department of Pediatrics, Modern University for Technology & Information (MTI) University
- Ass. Prof. Ali Sobh (*Member*)  
Department of Pediatrics, Mansoura University (MANS)
- Dr. Amira Elhatab, Lecturer (*Member*)  
Department of Pediatrics, Ain Shams University (ASU)
- Prof. Ashraf Ahmed Galal (*Member*)  
Department of Pediatrics, Alexandria University (ALEXU)
- Prof. Dalia H. El- Ghoneimy (*Member*)  
Department of Pediatrics, Ain Shams University (ASU)
- Ass. Prof. Eman Fahmy (*Member*)  
Department of Pediatrics, Sohag University
- Dr. Ghada Abdel Haleem Shousha, Lecturer (*Member*)  
Department of Pediatrics, Ain Shams University (ASU)
- Ass. Prof. Ghada El Deriny (*Member*)  
Department of Pediatrics, Alexandria University (ALEXU)
- Prof. Hanan Abd El Lateef (*Member*)  
Department of Pediatrics, Ain Shams University (ASU)
- Ass. Prof. Iman Fahmy (*Member*)  
Department of Pediatrics, Suhag University
- Prof. Islam Elbaroudy (*Member*)  
Department of Pediatrics, Cairo University (CU)
- Prof. Maher Ahmed Abdel Hafez (*Member*)

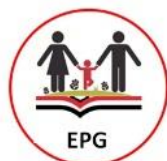

Department of Pediatrics, Tanta University (TU)

- Prof. Mohamed Almalky (*Member*)

Department of Pediatrics, Zagazig University (ZU)

- Dr. Naglaa Samy Mohamed Osman (*Member*)

Department of Pediatrics, Assiut University (AUN)

- Dr. Nehal Refaat, Ass. Lecturer (*Member*)

Department of Pediatrics, Armed Forces College of Medicine (AFCM)

- Ass. Prof. Nesrine Radwan (*Member*)

Department of Pediatrics, Ain Shams University (ASU)

- Ass. Prof. Rasha El-Owaidy (*Member*)

Department of Pediatrics, Ain Shams University (ASU)

- Dr. Sally Gouda (*Member*)

Department of Pediatrics, Ain Shams University (ASU)

- Prof. Sanaa Abd El Rahman Mahmoud (*Member*)

Department of Pediatrics, Ain Shams University (ASU)

- Prof. Sheren Esam Maher (*Member*)

Department of Pediatrics, Minia University (MU)

- Prof. Shereen Medhat Reda (*Member*)

Department of Pediatrics, Ain Shams University (ASU)

- Dr. Walaa Shoman, Lecturer (*Member*)

Department of Pediatrics, Alexandria University (ALEXU)

- Ass. Prof. Yomna Mohamed Farag (*Member*)

Department of Pediatrics, Cairo University (CU)

- Prof. Zeinab Awad El- Sayed (*Member*)

Department of Pediatrics, Ain Shams University (ASU)



## Cardiology

- Prof. Alyaa A. Kotby (*Lead*)  
Department of Pediatrics, Ain Shams University (ASU)
- Prof. Aly Abdelmohsen (*Member*)  
Department of Pediatrics, Alexandria University (ALEXU)
- Prof. Amal Elsisy (*Member*)  
Department of Pediatrics, Cairo University (CU)
- Prof. Baher Matta Hanna (*Member*)  
Department of Pediatrics, Cairo University (CU)  
Department of Pediatrics, Armed Forces College of Medicine (AFCM)
- Prof. Duaa M. Raafat (*Member*)  
Department of Pediatrics, Assiut University (AUN)
- Prof. FatmaAlzahraa Mostafa (*Member*)  
Department of Pediatrics, Cairo University (CU)
- Prof. Hala Agha (*Member*)  
Department of Pediatrics, Cairo University (CU)
- Prof. Hala Elmarsafawy (*Member*)  
Department of Pediatrics, Mansoura University (MANS)
- Prof. Hebatallah Attia (*Member*)  
Department of Cardiology, Ain Shams University (ASU)
- Prof. Magdy Mahmoud (*Member*)  
Department of Pediatrics, Minia University (MU)
- Dr. Mahmoud Nadder, Ass. Lecturer (*Member*)  
Department of Pediatrics, Alexandria University (ALEXU)
- Prof. Maiy El-Sayed (*Member*)  
Department of Cardiology, Ain Shams University (ASU)
- Prof. Mona El Ganzoury (*Member*)  
Department of Pediatrics, Ain Shams University (ASU)
- Dr. Nora Elsamman, Lecturer (*Member*)  
Department of Pediatrics, Ain Shams University (ASU)



- Prof. Sally Ahmed Farid El-Sahrigy (*Member*)  
Pediatrics Department, Medical Research and Clinical Studies Institute,  
National Research Centre (NRC)
- Prof. Sonia El-Saiedi (*Member*)  
Department of Cardiology, Ain Shams University (ASU)
- Ass. Prof. Yasmin Abdelrazek (*Member*)  
Department of Cardiology, Ain Shams University (ASU)

### Clinical Nutrition

- Prof. Sanaa Youssef Shaaban (*Lead*)  
Department of Pediatrics, Ain Shams University (ASU)
- Prof. Afaf Abdel Fattah Tawfik (*Member*)  
National Nutrition Institute
- Dr. Asmaa Sadek A. Sadek (*Member*)  
Department of Pediatrics, Armed Forces College of Medicine (AFCM)
- Dr. Ayah Shabana (*Member*)  
Department of Pediatrics, Armed Forces College of Medicine (AFCM)
- Prof. Ehab Khairy El Khashab (*Member*)  
Department of Pediatrics, Ain Shams University (ASU)
- Prof. Enas Raafat (*Member*)  
Department of Child Health, Medical Research and Clinical Studies  
Institute, National Research Centre (NRC)
- Prof. Hanna Mohamed Abulghar (*Member*)  
Department of Pediatrics, Cairo University (CU)
- Prof. Mahmoud Rashad (*Member*)  
Department of Pediatrics, Al-Azhar University
- Dr. Manar Mohamed Fathy (*Member*)  
Department of Pediatrics, Zagazig University (ZU)
- Prof. Mourad Alfy Ramzy Tadros (*Member*)  
Department of Pediatrics, Armed Forces College of Medicine (AFCM)



- Dr. Nahed Mohamed Hamdy (*Member*)  
Department of Pediatrics, Armed Forces College of Medicine (AFCM)
- Prof. Osama Mahmoud El-Asheer (*Member*)  
Department of Pediatrics, Assiut University (AUN)
- Dr. Shrouk Moataz Abdallah (*Member*)  
Department of Pediatrics, Cairo University (CU)
- Prof. Somaya Mohamed Abd El-Ghany (*Member*)  
Department of Pediatrics, Al-Azhar University
- Prof. Tayseer Mohamed El Zayat (*Member*)  
Department of Pediatrics, Al-Azhar University
- Ass. Prof. Yasmin Gamal El Gendy (*Member*)  
Department of Pediatrics, Ain Shams University (ASU)

#### Critical Care and Emergency Medicine

- Prof. Hafez Mahmoud Bazaraa (*Lead*)  
Department of Pediatrics, Cairo University (CU)
- Ass. Prof. Ahmed Rezk Ahmed (*Member*)  
Department of Pediatrics, Ain Shams University (ASU)
- Dr. Alyaa Ahdy Abdel Aziz (*Member*)  
Department of Pediatrics, Minufiya University
- Prof. Ateyat Abo Elfotoh Ateya (*Member*)  
Department of Pediatrics, Al-Azhar University
- Prof. Azza Ahmed Eltayeb (*Member*)  
Department of Pediatrics, Assiut University (AUN)
- Prof. Dalia A. Abdelrahman (*Member*)  
Department of Pediatrics, Zagazig University (ZU)
- Ass. Professor Effat Hussein Assar (*Member*)  
Department of Pediatrics, Benha University (BU)
- Prof. Hanaa Ibrahim Rady (*Member*)  
Department of Pediatrics, Cairo University (CU)





- Prof. Khaled Talaat Muhammad  
Department of Pediatrics, Tanta University (TU)
- Dr. Marwa Nabil Saad, Ass. Lecturer (*Member*)  
Department of Pediatrics, Cairo University (CU)
- Prof. Mervat Gamal Eldin Mansour (*Member*)  
Department of Pediatrics, Ain Shams University (ASU)
- Prof. Mohamed Mahmood Ahmed Romih (*Member*)  
Department of Pediatrics, Zagazig University (ZU)
- Prof. Nehad Ahmed Karam Abd Elfatah (*Member*)  
Department of Pediatrics, Zagazig University (ZU)
- Dr. Nevin Abdullah Kamel (*Member*)  
Casualty Department, Zagazig University Hospital, Zagazig
- Dr. Noha El-Anwar, Lecturer (*Member*)  
Department of Pediatrics, Cairo University (CU)
- Prof. Sarah Naeem Bartella Hebish (*Member*)  
Pediatric Oncology and Intensive Care Department, National Cancer  
Institute, Cairo University
- Ass. Professor Shereen Abdel Monem Mohamed (*Member*)  
Department of Pediatrics, Cairo University (CU)
- Ass. Prof. Sondos Mohamed Magdy (*Member*)  
Department of Pediatrics, Ain Shams University (ASU)
- Dr. Tarek Abd El Latef Abd El Aziz, Lecturer (*Member*)  
Department of Pediatrics, Zagazig University (ZU)

### Endocrinology

- Prof. Mona Mamdouh Hassan (*Lead*)  
Department of Pediatrics, Cairo University (CU)
- Ass. Prof. Amal Gaber Mohamed (*Member*)  
Department of Pediatrics, Al-Azhar University
- Prof. Amany Kamal El-Hawary (*Member*)





Department of Pediatrics, Mansoura University (MANS)

- Prof. Amina M. Abdel Wahab (*Member*)

Department of Pediatrics, Suez Canal University (SCU)

- Prof. Ashraf A. Elsharkawy (*Member*)

Department of Pediatrics, Mansoura University (MANS)

- Prof. Basma Abd-Elmoez

Department of Pediatrics, Minia University (MU)

- Dr. Eman Elshanawany (*Member*)

Department of Pediatrics, Benha University (BU)

- Prof. Hanaa Abdellateef Mohamad (*Member*)

Department of Pediatrics, Assiut University (AUN)

- Dr. Hanan Hassan Aly, Lecturer (*Member*)

Department of Pediatrics, Ain Shams University (ASU)

- Prof. Hoda Atwa (*Member*)

Department of Pediatrics, Suez Canal University (SCU)

- Prof. Lubna Fawaz (*Member*)

Department of Pediatrics, Cairo University (CU)

- Dr. Mariam Nader Moawad, Ass. Lecturer (*Member*)

Department of Pediatrics, Armed Forces College of Medicine (AFCM)

- Dr. Marian Fares Nashed, Ass. Lecturer (*Member*)

Department of Pediatrics, Armed Forces College of Medicine (AFCM)

- Ass. Prof. Mona Karem Amin (*Member*)

Department of Pediatrics, Suez Canal University (SCU)

- Prof. Nora E. Badawi (*Member*)

Department of Pediatrics, Cairo University (CU)

- Ass. Prof. Nouran Y. Salah El-Din (*Member*)

Department of Pediatrics, Ain Shams University (ASU)

- Ass. Prof. Omneya Magdy Omar (*Member*)

Department of Pediatrics, Alexandria University (ALEXU)

- Dr. Ramy Saleh Morsy, Lecturer (*Member*)



Department of Pediatrics, Armed Forces College of Medicine (AFCM)

- Prof. Randa M. Matter (*Member*)

Department of Pediatrics, Ain Shams University (ASU)

- Ass. Prof. Remon M. Yousef (*Member*)

Department of Pediatrics, Fayoum University (FU)

- Prof. Sabry M Ghanem (*Member*)

Department of Pediatrics, Al-Azhar University

- Prof. Safinaz El Habashy (*Member*)

Department of Pediatrics, Ain Shams University (ASU)

- Ass. Prof. Shaymaa Elsayed Abdel Meguid (*Member*)

Department of Pediatrics, Alexandria University (ALEXU)

- Prof. Shereen Abdelghaffar (*Member*)

Department of Pediatrics, Cairo University (CU)

- Prof. Wiam Al Farouk Younis (*Member*)

Department of Pediatrics, Armed Forces College of Medicine (AFCM)

## Gastroenterology

- Prof. Ayman Emil Eskander (*Lead*)

Department of Pediatrics, Cairo University (CU)

- Prof. Suzan Samir Gad (*Lead*)

Department of Pediatrics, Suez Canal University (SCU)

Department of Pediatrics, Suez University (SU)

- Prof. Abeer M. Nour ELDin Abd ElBaky (*Member*)

Department of Pediatrics, Medical Research and Clinical Studies Institute,  
National Research Centre (NRC)

- Prof. Ahmed Foad (*Member*)

Department of Pediatrics, Alexandria University (ALEXU)

- Prof. Ahmed Hamdy (*Member*)

Department of Pediatrics, Ain Shams University (ASU)

- Dr. Ahmed Hendawy, Lecturer (*Member*)



Department of Pediatrics, Al-Azhar University

- Prof. Ahmed Mohammed Hamdy (*Member*)

Department of Pediatrics, Ain Shams University (ASU)

- Prof. Amal Mahfouz (*Member*)

Department of Pediatrics, Alexandria University (ALEXU)

- Dr. Baher Hanaa (*Member*)

Department of Pediatrics, Cairo University (CU)

- Dr. Ehab W. Abd Elmohsen, Lecturer (*Member*)

Department of Pediatrics, Armed Forces College of Medicine (AFCM)

- Dr. Eslam Tawfik ElBaroudy (*Member*)

Department of Pediatrics, Cairo University (CU)

- Prof. Gihan Mohamed Mohamed Bebars (*Member*)

Department of Pediatrics, Minia University (MU)

- Dr. Hala Hussien Mansour, Lecturer (*Member*)

Department of Pediatrics, Cairo University (CU)

- Prof. Hanan Fathy (*Member*)

Department of Pediatrics, Cairo University (CU)

- Dr. Hend Fayez (*Member*)

Department of Pediatrics, Armed Forces College of Medicine (AFCM)

- Prof. Hosam F. El-Saadany (*Member*)

Department of Pediatrics, Zagazig University (ZU)

- Prof. Manal Sadek Eldefrawy (*Member*)

Department of Pediatrics, Benha University (BU)

- Prof. Maha Abou Zekri (*Member*)

Department of Pediatrics, Cairo University (CU)

- Prof. Marwa Talaat Eldeeb (*Member*)

Department of Pediatrics, Ain Shams University (ASU)

- Prof. Mohamed Amin (*Member*)

Department of Pediatrics, Mansoura University (MANS)

- Prof. Mohamed Ezz El Regal (*Member*)



Department of Pediatrics, Mansoura University (MANS)

- Prof. Mohamed Genina (*Member*)

Department of Pediatrics, Cairo University (CU)

- Prof. Mohammed Nabih Almohammady (*Member*)

Department of Pediatrics, Cairo University (CU)

- Prof. Mohamed Saad Eldin Eladawy (*Member*)

Department of Pediatrics, Ain Shams University (ASU)

- Prof. Naglaa Abu Faddan (*Member*)

Department of Pediatrics, Assiut University (AUN)

- Ass. Prof. Nesrine Radwan (*Member*)

Department of Pediatrics, Ain Shams University (ASU)

- Dr. Sarah Tarek (*Member*)

Department of Pediatrics, Cairo University (CU)

- Prof. Shereen Reda (*Member*)

Department of Pediatrics, Ain Shams University (ASU)

- Dr. Yosra Mohsen Awad, Lecturer (*Member*)

Department of Pediatrics, Ain Shams University (ASU)

## Hematology

- Prof. Galila Mokhtar (*Lead*)

Department of Pediatrics, Ain Shams University (ASU)

- Prof. Amira Adly (*Member*)

Department of Pediatrics, Ain Shams University (ASU)

- Prof. Azza Abd El Gawad Tantawy (*Member*)

Department of Pediatrics, Ain Shams University (ASU)

- Prof. Dina Ezzat (*Member*)

Department of Pediatrics, Beni-Suef University (BSU)

- Prof. Gehan Lotfy (*Member*)

Department of Pediatrics, Minia University (MU)

- Prof. Hoda Hassab (*Member*)



Department of Pediatrics, Alexandria University (ALEXU)

- Prof. Ilham Youssry (*Member*)

Department of Pediatrics, Cairo University (CU)

- Prof. Iman Ragab (*Member*)

Department of Pediatrics, Ain Shams University (ASU)

- Prof. Laila Sherief (*Member*)

Department of Pediatrics, Zagazig University (ZU)

- Prof. Marwa Zakaria (*Member*)

Department of Pediatrics, Zagazig University (ZU)

- Prof. Mervat Abdallah Hesham (*Member*)

Department of Pediatrics, Zagazig University (ZU)

- Dr. Naglaa Shaheen (Consultant) (*Member*)

Pediatric Hematology Department, Health Insurance Organization (HIO)

- Ass. Prof. Niveen Salama (*Member*)

Department of Pediatrics, Cairo University (CU)

- Dr. Nouran Yousef Salah, Lecturer (*Member*)

Department of Pediatrics, Ain Shams University (ASU)

- Prof. Rasha Abdel-Raouf Afifi (*Member*)

Department of Pediatrics, Cairo University (CU)

- Prof. Rasha El-Ashry (*Member*)

Department of Pediatrics, Mansoura University (MANS)

- Ass. Prof. Sara Makkeyah (*Member*)

Department of Pediatrics, Ain Shams University (ASU)

- Prof. Sherein Abdelhamid Shalaby (*Member*)

Department of Pediatrics, Helwan University (HU)

- Prof. Sonia Adolf Habib (*Member*)

Department of Pediatrics, Medical Research and Clinical Studies Institute,  
National Research Centre (NRC)



## Neonatology

- Prof. Abdel-Azeem Mohamed El-Mazary (*Lead*)  
Department of Pediatrics, Minia University (MU)
- Prof. Afaf Abdel Wahab Korraa (*Lead*)  
Department of Pediatrics, Al-Azhar University
- Prof. Iman Fathy Iskander (*Lead*)  
Department of Pediatrics, Cairo University (CU)
- Prof. Mosallam Mohammed Nasser (*Lead*)  
Department of Pediatrics, Al-Azhar University
- Dr. Ahmed Mahmoud Ali Mostafa, Consultant (*Member*)  
Department of Pediatrics, Assiut University (AUN)
- Dr. Ahmed Mahmoud Youssef, Lecturer (*Member*)  
Department of Pediatrics, Armed Forces College of Medicine (AFCM)
- Prof. Ahmed Mohsen Abdelhakeem (*Member*)  
Department of Pediatrics, Al-Azhar University
- Dr. Ayah Mohamed Shabana, Lecturer (*Member*)  
Department of Pediatrics, Ain Shams University (ASU)
- Dr. Dina Essam Rabie, Lecturer (*Member*)  
Department of Pediatrics, Ain Shams University (ASU)
- Ass. Prof. Effat Hussein Assar (*Member*)  
Department of Pediatrics, Benha University (BU)
- Dr. Eman Almorsy (*Member*)  
Department of Pediatrics, Al-Azhar University
- Dr. Esraa Ahmed Elmazzahy, Lecturer (*Member*)  
Department of Pediatrics, Cairo University (CU)
- Prof. Gamal Samy (*Member*)  
Department of Pediatrics, Ain Shams University (ASU)
- Prof. Ghada Ibrahim Gad (*Member*)  
Department of Pediatrics, Ain Shams University (ASU)
- Dr. Hala Fouad (*Member*)





Department of Pediatrics, Misr University for Science & Technology  
(MUST)

- Prof. Hisham Abd Elsamee Awad (*Member*)

Department of Pediatrics, Ain Shams University (ASU)

- Dr. Hussein Hanafy (*Member*)

Department of Pediatrics, Helwan University (HU)

- Ass. Prof. Madiha Abda-Allah Sayed (*Member*)

Department of Pediatrics, Minia University (MU)

- Ass. Prof. Mohamed Abdel-Kader (*Member*)

Department of Pediatrics, Misr University for Science & Technology  
(MUST)

- Prof. Mohamed Mamdouh Gaafar (*Member*)

Department of Pediatrics, Zagazig University (ZU)

- Dr. Mohammed Abdelshafy (*Member*)

Department of Pediatrics, Benha University (BU)

- Prof. Mostafa Abdel Azim (*Member*)

Department of Pediatrics, Benha University (BU)

- Dr. Nefesa Raafat (*Member*)

Department of Pediatrics, Assiut University (AUN)

- Dr. Nouran B. AbdAlla (*Member*)

Department of Pediatrics, Suez Canal University (SCU)

- Prof. Osama Abou El Fotouh El- Fiky (*Member*)

Department of Pediatrics, Benha University (BU)

- Dr. Rabab Gameel Abdel-Hamed Allam, Lecturer (*Member*)

Department of Pediatrics, Ain Shams University (ASU)

- Prof. Reem Mahmoud (*Member*)

Department of Pediatrics, Cairo University (CU)

- Prof. Safaa Shafik Emam (*Member*)

Department of Pediatrics, Ain Shams University (ASU)

- Ass. Prof. Salah Ibrahim (*Member*)





Department of Pediatrics, Misr University for Science & Technology  
(MUST)

- Prof. Sameh Tewfik (*Member*)

Department of Pediatrics, Armed Forces College of Medicine (AFCM)

- Ass. Prof. Walaa Alsharany Abuelhamd (*Member*)

Department of Pediatrics, Cairo University (CU)

- Dr. Zahraa Ez El-Din (*Member*)

Department of Pediatrics, Cairo University (CU)

## Nephrology

- Prof. Bahia H. Moustafa (*Lead*)

Department of Pediatrics, Cairo University (CU)

- Ass. Prof. Abeer Selim (*Member*)

Department of Pediatrics, Medical Research and Clinical Studies Institute,  
National Research Centre (NRC)

- Prof. Ahmed Badr (*Member*)

Department of Pediatrics, Cairo University (CU)

- Ass. Prof. Ahmed Hussien (*Member*)

Department of Pediatrics, Ain Shams University (ASU)

- Prof. Ayman Hammad (*Member*)

Department of Pediatrics, Mansoura University (MANS)

- Ass. Prof. Dina E. Sallam (*Member*)

Department of Pediatrics, Ain Shams University (ASU)

- Prof. Doaa Youssef (*Member*)

Department of Pediatrics, Zagazig University (ZU)

- Dr. Fatma Atia, Lecturer (*Member*)

Department of Pediatrics, Cairo University (CU)

- Prof. Gamal Taha Soliman (*Member*)

Department of Pediatrics, Port Said University (PSU)

- Dr. Hend Abdel El Nabi (*Member*)



Department of Pediatrics, Tanta University (TU)

- Prof. Ihab Z. El Hakim (*Member*)

Department of Pediatrics, Ain Shams University (ASU)

- Dr. Isra El Bahkiry (*Member*)

Department of Pediatrics, Mansoura University (MANS)

- Prof. Mahmoud M. El-Kersh (*Member*)

Department of Pediatrics, Alexandria University (ALEXU)

- Dr. Mai Korkor (*Member*)

Department of Pediatrics, Mansoura University (MANS)

- Dr. Marwa Dagher (*Member*)

Department of Pediatrics, Mansoura University (MANS)

- Ass. Prof. Marwa Nabhan (*Member*)

Department of Pediatrics, Cairo University (CU)

- Prof. Moftah Mohamed Rabie (*Member*)

Department of Pediatrics, Al-Azhar University

- Prof. Mohamed Shouman (*Member*)

Department of Pediatrics, Medical Research and Clinical Studies Institute,  
National Research Centre (NRC)

- Dr. Moustafa El Balshy (*Member*)

Department of Pediatrics, Benha University (BU)

- Dr. Nancy Abdel-Salam (*Member*)

Department of Pediatrics, Alexandria University (ALEXU)

- Prof. Ragia Marei Ali (*Member*)

Department of Pediatrics, Ain Shams University (ASU)

- Ass. Prof. Sameh Abdelaziz Ahmed Mansour (*Member*)

Department of Pediatrics, Al-Azhar University

- Prof. Samuel Makar (*Member*)

Department of Pediatrics, Cairo University (CU)

- Prof. Sawsan Moselhy (*Member*)

Department of Pediatrics, Ain Shams University (ASU)



- Prof. Sherein Shalaby (*Member*)

Department of Pediatrics, Suez Canal University (SCU)

## Neurology

### National

- Prof. Tarek El Sayed Ismail Omar (*Lead*)

Department of Pediatrics, Alexandria University (ALEXU)

- Ass. Prof. Abdelsattar Abdallah Elsayeh (*Member*)

Department of Pediatrics, Al-Azhar University

- Dr. Amr I. Risha, Lecturer (*Member*)

Department of Pediatrics, Zagazig University (ZU)

- Prof. Ashraf Azmy El-Refaie (*Member*)

Department of Child Health, Medical Research and Clinical Studies  
Institute, National Research Centre (NRC)

- Prof. Azza Ahmed Eltayeb

Department of Pediatrics, Assiut University (AUN)

- Prof. Dalia Abdellatif Abdelrahman (*Member*)

Department of Pediatrics, Zagazig University (ZU)

- Prof. Ebtesam Hussein El Melegy (*Member*)

National Institute of Neuromotor System,  
General Organization for Teaching Hospitals and Institutes

- Dr. Fikry Bassiouny, Consultant\* (*Member*)

Ministry of Health and Population (MOHP)

- Prof. Hadeer Mahmoud Gamal Eldin Abdelghaffar (*Member*)

Department of Pediatrics, Fayoum University (FU)

- Dr. Hammouda Eid El Gazzar, Fellow and Lecturer (*Member*)

El Beheira Health Directorate, General Organization of Teaching  
Hospitals, Ministry of Health and Population (MOHP)

- Prof. Hanan Mohamed Ibrahim

Department of Pediatrics, Ain Shams University (ASU)



- Prof. Hoda Yehia Tomoum (*Member*)  
Department of Pediatrics, Ain Shams University (ASU)
- Prof. Iman Ali Elagouza (*Member*)  
Department of Pediatrics, Ain Shams University (ASU)
- Prof. Lobna Abdel Gawad Mansour (*Member*)  
Department of Pediatrics, Cairo University (CU)
- Ass. Prof. Marwa Abd Elmaksoud (*Member*)  
Department of Pediatrics, Alexandria University (ALEXU)
- Dr. Michael Nabil Halim Tanious, Lecturer (*Member*)  
Department of Pediatrics, Ain Shams University (ASU)
- Prof. Moustafa Zakaria Mohamed (*Member*)  
Department of Pediatrics, Cairo University (CU)
- Prof. Omnia Fathy El Rashidy (*Member*)  
Department of Pediatrics, Ain Shams University (ASU)
- Dr. Raghda M. H. Zaitoun, Lecturer (*Member*)  
Department of Pediatrics, Ain Shams University (ASU)
- Prof. Sahar M. A. Hassanein (*Member*)  
Department of Pediatrics, Ain Shams University (ASU)

#### International

- Dr. Christopher Rittey, Consultant (*Member*)  
Sheffield Children's NHS Foundation Trust, UK

#### Pulmonology

- Prof. Eman Mahmoud Fouda (*Lead*)  
Department of Pediatrics, Ain Shams University (ASU)
- Prof. Mohamed M. Rashad (*Lead*)  
Department of Pediatrics, Benha University (BU)
- Prof. Tarek Hamed (*Lead*)  
Department of Pediatrics, Zagazig University (ZU)
- Prof. Abba Saleh Mostafa (*Member*)



Department of Pediatrics, Cairo University (CU)

- Dr. Ahmad Ata Sobeih, Lecturer (*Member*)

Department of Pediatrics, Benha University (BU)

- Prof. Ahmed Mohamad Abd Al-Razek (*Member*)

Department of Pediatrics, Tanta University (TU)

- Dr. Amal Ibrahim Hassanain (*Member*)

Pediatrics Department, Medical Research and Clinical Studies Institute,  
National Research Centre (NRC)

- Prof. Dina Hossam Eldine Hamed (*Member*)

Department of Pediatrics, Cairo University (CU)

- Ass. Prof. Dina Tawfeek Sarhan (*Member*)

Department of Pediatrics, Zagazig University (ZU)

- Prof. Hala Gouda Elnady (*Member*)

Department of Child Health, Medical Research and Clinical Studies  
Institute, National Research Centre (NRC)

- Prof. Hala Hamdi (*Member*)

Department of Pediatrics, Cairo University (CU)

- Prof. Hoda M. Salah El-Din Metwally (*Member*)

Department of Pediatrics, Al-Azhar University

- Prof. Magda Hassab Allah Mohamed (*Member*)

Department of Pediatrics, Al-Azhar University

- Prof. Magda Gobran (*Member*)

Department of Pediatrics, Al-Azhar University

- Dr. Malak Shaheen (*Member*)

Pediatrics Department, Ain Shams University (ASU)

- Prof. Mona Mohsen Elattar (*Member*)

Department of Pediatrics, Cairo University (CU)

- Prof. Mostafa Al-Saeed (*Member*)

Department of Pediatrics, Assiut University (AUN)

- Prof. Shahanaz Mahmoud Hussein (*Member*)



Department of Pediatrics, Al-Azhar University

- G.M. Prof. Usama Kasam (*Member*)

Department of Pediatrics, Armed Forces College of Medicine (AFCM)

#### Additional Contributors (*other than Pediatrics*)

- Prof. Alaa Roushdy (*Member*)

Department of Diagnostic Radiology, Ain Shams University (ASU)

- Prof. Hayam Refaat Tantawi (*Member*)

Pediatric Nursing, Faculty of Nursing, Ain Shams University (ASU)

- Prof. Manal Salman (*Member*)

Department of Pathology, Ain Shams University (ASU)

- Dr. Marwa Sayed Mohammed Moussa, Lecturer (*Member*)

Department of Diagnostic Radiology, Ain Shams University (ASU)

- Prof. Maysaa Abdallah Saeed (*Member*)

Tropical Medicine and Infectious Diseases, Zagazig University (ZU)

- Prof. Mohamed-Adel Elgamal (*Member*)

Department of Congenital and Pediatric Cardiac Surgery, Mansoura University (MANS)

- Dr. Nesreen Mohamad Kamal, Lecturer (*Member*)

Department of Community Medicine, Cairo University (CU)

- Prof. Noha Mohamed Abdelsalam Sakr (*Member*)

Department of Community Medicine, Zagazig University (ZU)

- Pharmacist Sara Naeem Bartella Hebish (*Member*)

Senior Clinical Pharmacist, Pediatric Oncology and ICU Department,  
National Cancer Institute, Cairo University (CU)



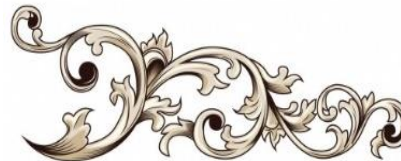

## Members, Guideline Methodology Supervision Group

*(The authorship group of this review)*

- [Prof. Ashraf Abdel Baky](#)
- [Prof. Tarek E. I. Omar](#)
- [Dr. Yasser S. Amer](#)

## Members, External Review Groups

### Clinical Content Reviewers

#### Allergy, Immunology and Rheumatology

##### *National*

- Ass. Prof. Ghada Al-Deriny  
Department of Pediatrics, Alexandria University (ALEXU)
- Prof. Mahmoud M. El-Zalabany  
Department of Pediatrics, Alexandria University (ALEXU)
- Prof. Mohamed Ezz Al-Regal  
Department of Pediatrics, Mansoura University (MANS)
- Prof. Mostafa El-Hodhod  
Department of Pediatrics, Ain Shams University (ASU)
- Prof. Zeinab Awad El-Sayed  
Department of Pediatrics, Ain Shams University (ASU)

##### *International*

- Prof. Angelo Ravelli  
Pediatrics, Department of Neurosciences, Rehabilitation, Ophthalmology, Genetics, and Maternal-Infantile Science (DiNOGMI), University of Geno, Italy.
- Prof. Lanny J. Rosenwasser  
Department of Medicine, University of Missouri-Kansas City School of Medicine, American Academy of Allergy, Asthma & Immunology (AAAAI), USA, World Allergy Organization (WAO)





- Dr. Karen Brandt Onel  
Division of Pediatric Rheumatology, Hospital for Special  
Surgery (HSS), Clinical Pediatrics Weil Cornell Medicine, USA
- Prof. Robert F. Lemanske, Jr  
Institute for Clinical and Translational Research, University of Wisconsin  
School of Medicine and Public Health, USA
- Ass. Prof. Soad Hashad  
Pediatric Rheumatology, Tripoli University, Libya.
- Prof. Sami Bahna  
Pediatrics & Medicine, Allergy and Immunology Section, Louisiana State  
University Health Sciences Center, USA
- Prof. Seza Özen  
Department of Pediatric Rheumatology, Hacettepe University, Ankara,  
Turkey

#### Cardiology

- Prof. Alyaa A. Kotby  
Department of Pediatrics, Ain Shams University (ASU)

#### Critical Care/ Emergency Medicine

##### *National*

- Prof. Hatem Hussein  
Department of Pediatrics, Zagazig University (ZU)
- Prof. Khaled Talaat Muhammad  
Department of Pediatrics, Tanta University (TU)
- Prof. Mahmoud Taher Elmogy  
Department of Pediatrics, Al-Azhar University
- Prof. Mohammed Attia El-Bayoumi  
Department of Pediatrics, Mansoura University (MANS)
- Prof. Nabil Abdel-Aziz Mohsen  
Department of Pediatrics, Cairo University (CU)



- Prof. Tarek Abd El Gawwad

Department of Pediatrics, Ain Shams University (ASU)

#### *International*

- Prof. Patrick Van de Voorde

Department of Emergency Medicine, Ghent University Hospital, Belgium

Belgian Society of Emergency & Disaster Medicine (BeSEDiM)

### Endocrinology

#### *National*

- Prof. Basma Abd-Elmoez

Department of Pediatrics, Minia University (MU)

- Prof. Eman Munir

Department of Pediatrics, Ain Shams University (ASU)

- Prof. Hesham El Hefnawy

National Institute of Diabetes and Endocrinology (NIDE).

- Prof. Magdy Omar

Department of Pediatrics, Alexandria University (ALEXU)

- Prof. Nermine Salah

Department of Pediatrics, Cairo University (CU)

#### *International*

- Prof. Joseph Wolfsdorf

Department of Pediatrics, Harvard Medical School

Boston Children's Hospital, USA

### Gastroenterology

#### *National*

- Dr. Ahmed Megahed

Department of Pediatrics, Mansoura University (MANS)

- Prof. Mohamed Attia Bayoumi

Department of Pediatrics, Mansoura University (MANS)

- Dr. Mohamed El Guindy



Department of Pediatrics, Menoufia University

- Prof. Soheir Ibrahim

Department of Pediatrics, Al-Azhar University

#### *International*

- Prof. Hania Szajewska

Department of Pediatrics, The Medical University of Warsaw, Poland

- Prof. Hassan Hesham Hassan

Department of Pediatrics, University of Arizona, Tucson, Arizona, USA

- Prof. Yvan Vandenplas

KidZ Health Castle Children's Hospital, UZ Brussel University Hospital,  
Vrije Universiteit Brussel, Belgium

#### *Hematology*

- Prof. Ahmed Kaddah

Department of Pediatrics, Cairo University (CU)

- Prof. Ahmed Mansour

Department of Pediatrics, Mansoura University (MANS)

- Prof. Azza Abd El Gawad Tantawy

Department of Pediatrics, Ain Shams University (ASU)

- Prof. Hoda Hassab

Department of Pediatrics, Alexandria University (ALEXU)

- Prof. Iman Abdel Raouf

Department of Pediatrics, Cairo University (CU)

- Prof. Khalil Abd El Khalek

Department of Pediatrics, Cairo University (CU)

- Prof. Mervat Atfy

Department of Pediatrics, Zagazig University (ZU)

- Prof. Mohamed Abdel-Mohsen

Department of Pediatrics, Ain Shams University (ASU)

- Prof. Osama El Safy



Department of Pediatrics, Zagazig University (ZU)

- Prof. Seham Ragab

Department of Pediatrics, Menoufia University

### Neonatology

- Prof. Abdel Azim El Mazary

Department of Pediatrics, Minia University (MU)

- Prof. Abd Ellatif Mohamed Abd Elmoez

Department of Pediatrics, Assiut University (AUN)

- Prof. Mohamed Abdelmaaboud

Department of Pediatrics, Minia University (MU)

- Prof. Mohamed Mohamed El Mazahi

Department of Pediatrics, Al-Azhar University

- Prof. Nahed Fahmy Helal

Department of Pediatrics, Cairo University (CU)

- Prof. Nehal Mohamed El Ragal

Department of Pediatrics, Ain Shams University (ASU)

- Prof. Safaa Elmeneza

Department of Pediatrics, Al-Azhar University

### Nephrology

#### National

- Prof. Alaa Thabet

Department of Pediatrics, Alexandria University (ALEXU)

- Prof. Amr Sarhan

Department of Pediatrics, Mansoura University (MANS)

- Prof. Ihab El Hakim

Department of Pediatrics, Ain Shams University (ASU)

- Prof. Moftah Mohamed Rabie

Department of Pediatrics, Al-Azhar University

- Prof. Mohamad Eissa



Department of Pediatrics, Cairo University (CU)

- Prof. Neveen A Soliman

Department of Pediatrics, Cairo University (CU)

- Prof. Sawsan Elmoselhy

Department of Pediatrics, Ain Shams University (ASU)

#### *International*

- Dr. Federica Zotta

University Department of Pediatrics, DPUO, Unit of Immune and Infectious Diseases, Bambino Gesù Children's Hospital and Research Institute (IRCCS), Rome, Italy.

- Prof. Pierre Cochat

Centre de référence des maladies rénales rares Néphrologes, Hôpital Femme Mère Enfant, Hospices Civils de Lyon & Université de Lyon, Lyon, France, Former S.G. of IPNA

#### *Neurology*

- Prof. Azza Ahmed Eltayeb

Department of Pediatrics, Assiut University (AUN)

- Prof. Bahaa El Sheikh

Department of Pediatrics, Aswan University (ASWU)

- Prof. Hafez Mahmoud Bazaraa

Department of Pediatrics, Cairo University (CU)

- Prof. Hanan Mohamed Ibrahim

Department of Pediatrics, Ain Shams University (ASU)

#### *Pulmonology*

- Prof. Fatma ElHeneidy

Department of Pediatrics, Cairo University (CU)

- Prof. Laila Abdel Ghaffar Hagazy

Department of Pediatrics, Ain Shams University (ASU)

Department of Pediatrics, Armed Forces College of Medicine, (AFCM)



- Prof. Mahmoud M. El-Zalabany  
Department of Pediatrics, Alexandria University (ALEXU)
- Prof. Magda Elseify  
Department of Pediatrics, Ain Shams University (ASU)
- Prof. Magdy Zidan  
Department of Pediatrics, Mansoura University (MANS)
- Prof. Nader Fasseh  
Department of Pediatrics, Alexandria University (ALEXU)
- Dr. Osama Taha Amer  
Department of Pediatrics, Zagazig University (ZU)
- Prof. Sherif Reda  
Department of Pediatrics, Al-Azhar University
- Prof. Tharwat Deraz  
Department of Pediatrics, Ain Shams University (ASU)

#### Additional Contributors (*other than Pediatrics*)

- Dr. Magdy El-Ekiaby, Consultant of Transfusion Medicine (*Member*)  
Blood Transfusion & Hemophilia Centre, Shabrawishi Hospital
- Prof. Mohamed Shehata  
Department of ENT, Ain Shams University (ASU)
- Prof. Salwa Youssef  
Department of Clinical Pathology, Hematology & Blood Transfusion,  
Ain Shams University (ASU)  
Egyptian Society of Transfusion Medicine

#### Methodology Reviewer

- [Prof. Ivan D. Florez](#)  
Department of Pediatrics, University of Antioquia, Medellin, Colombia  
School of Rehabilitation Science, McMaster University, Hamilton, Canada  
Leader of the AGREE Collaboration  
Director of Cochrane Colombia





## EPG Group Photos

Group photographs of the early grand meetings of the EPG members and collaborators

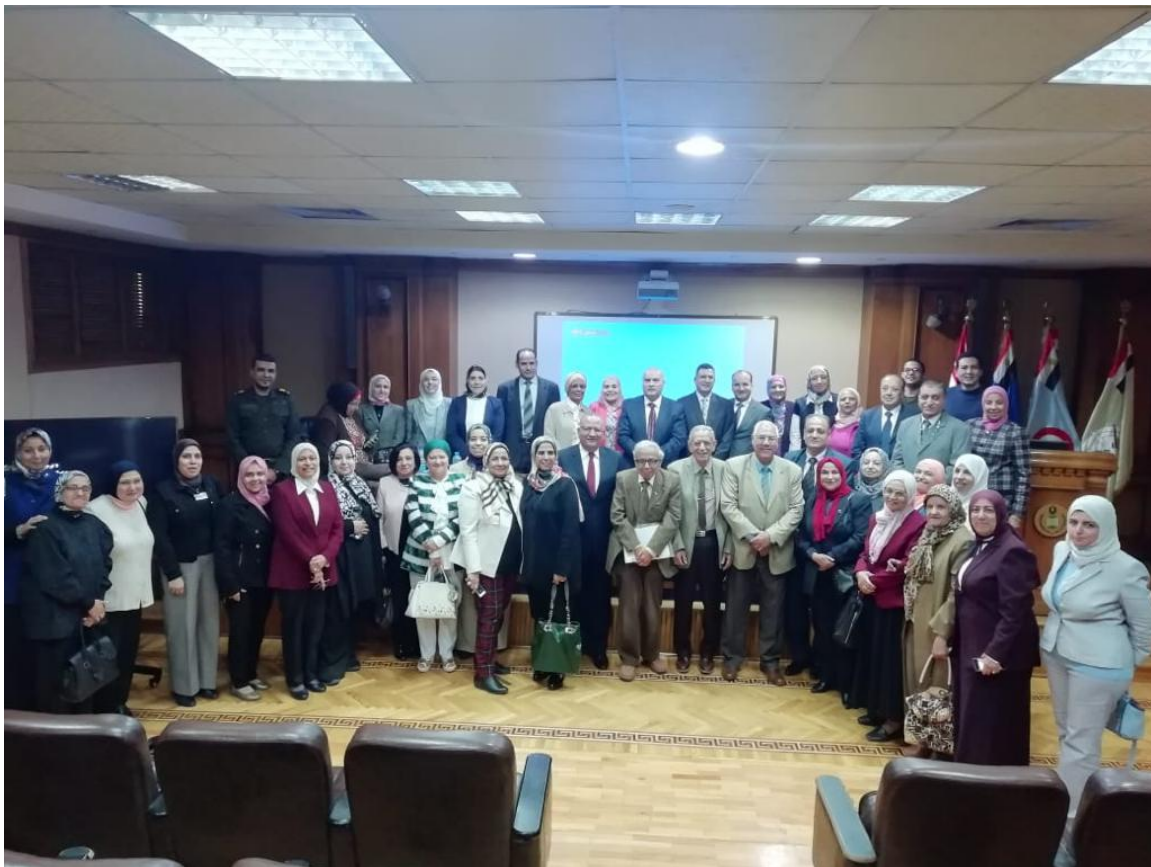



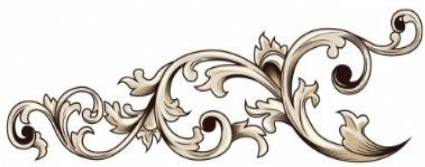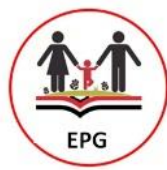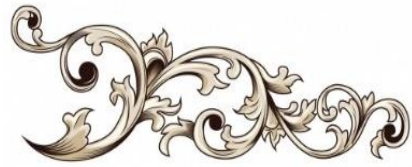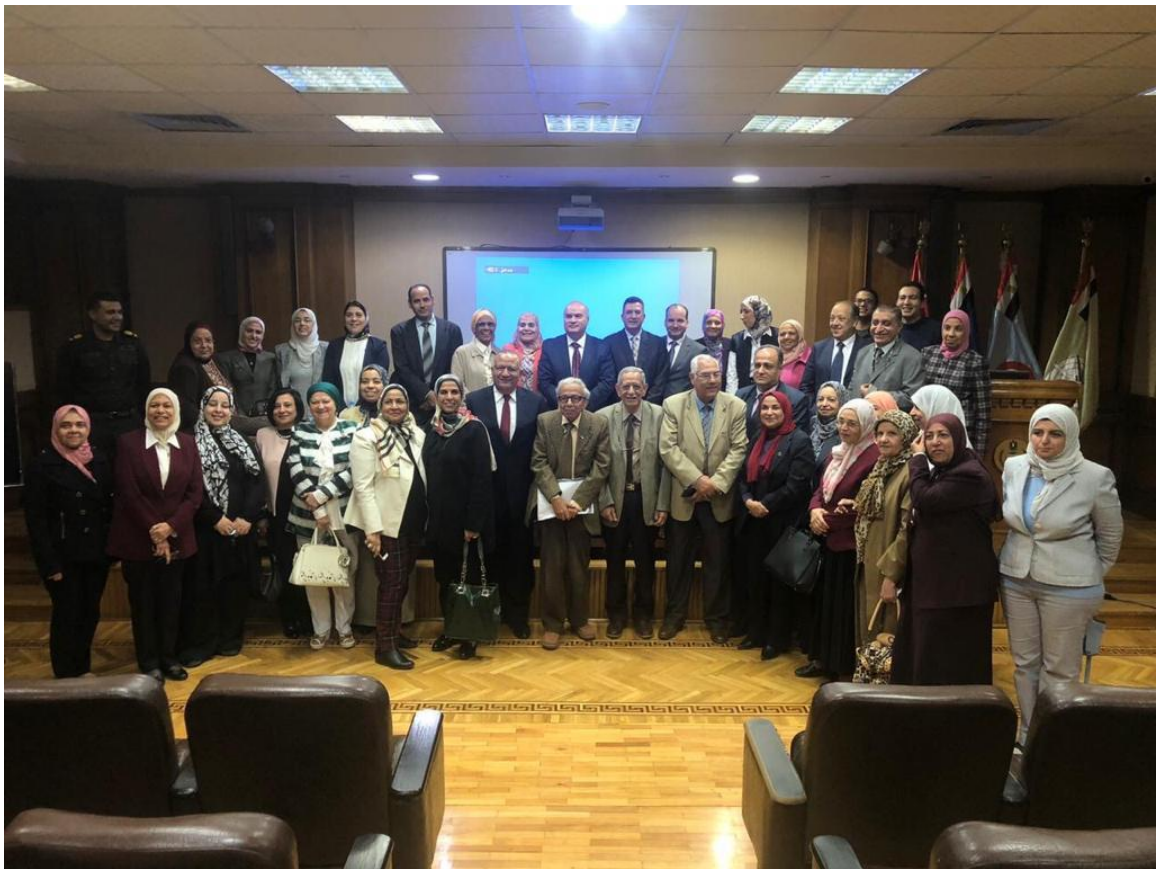

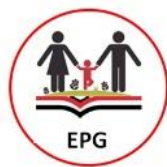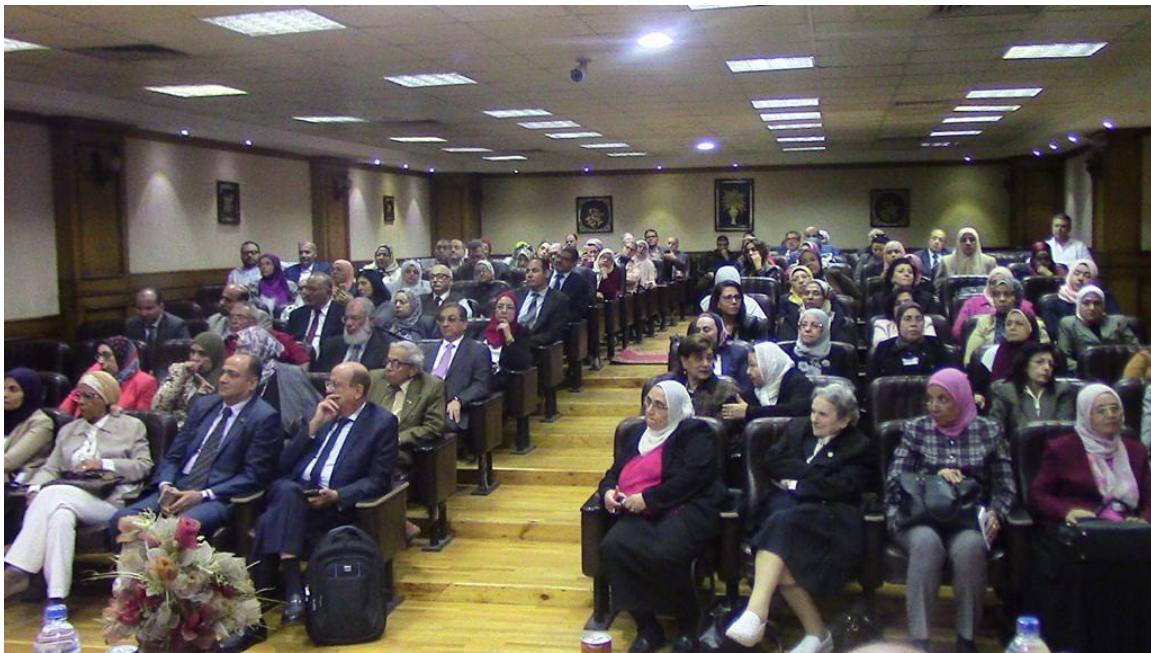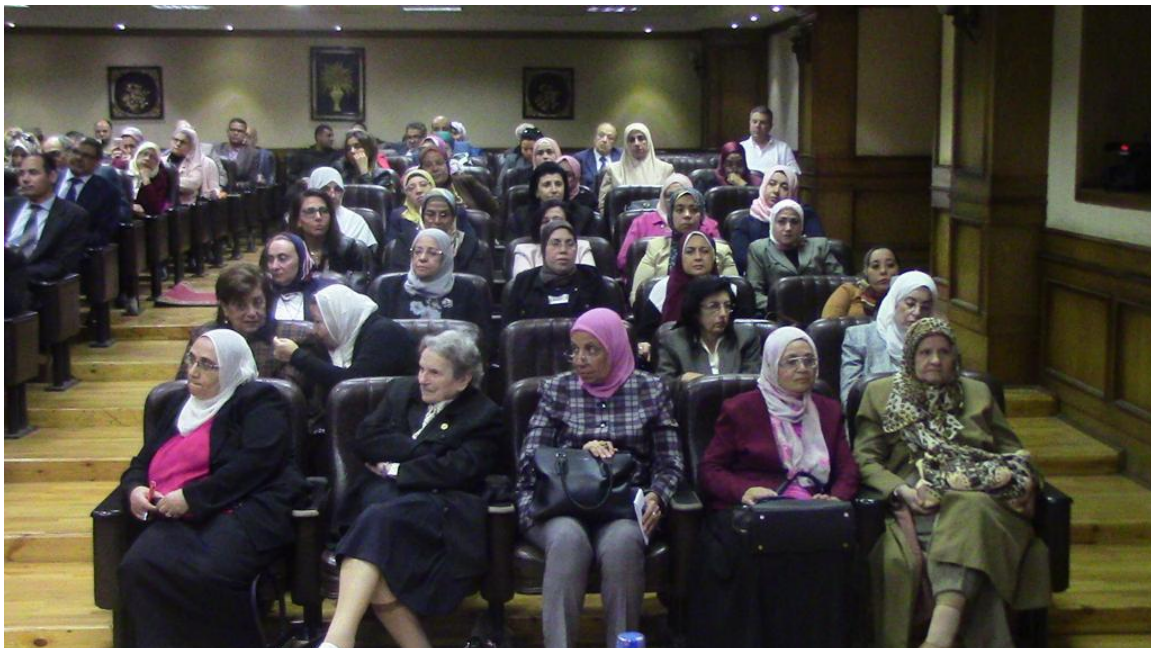



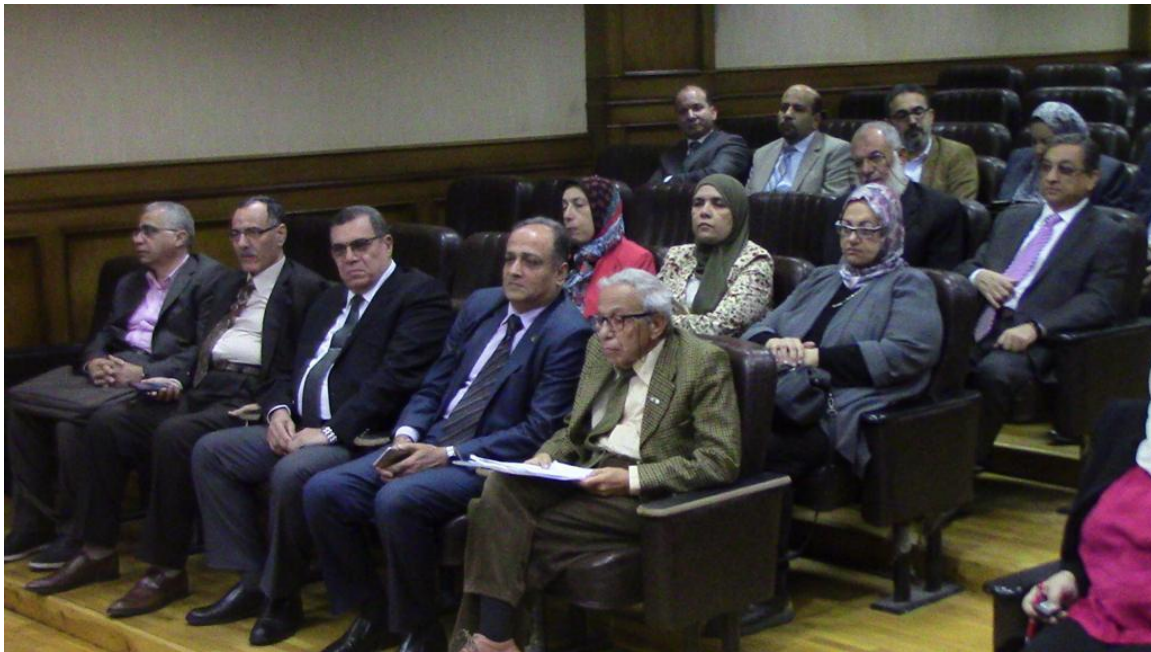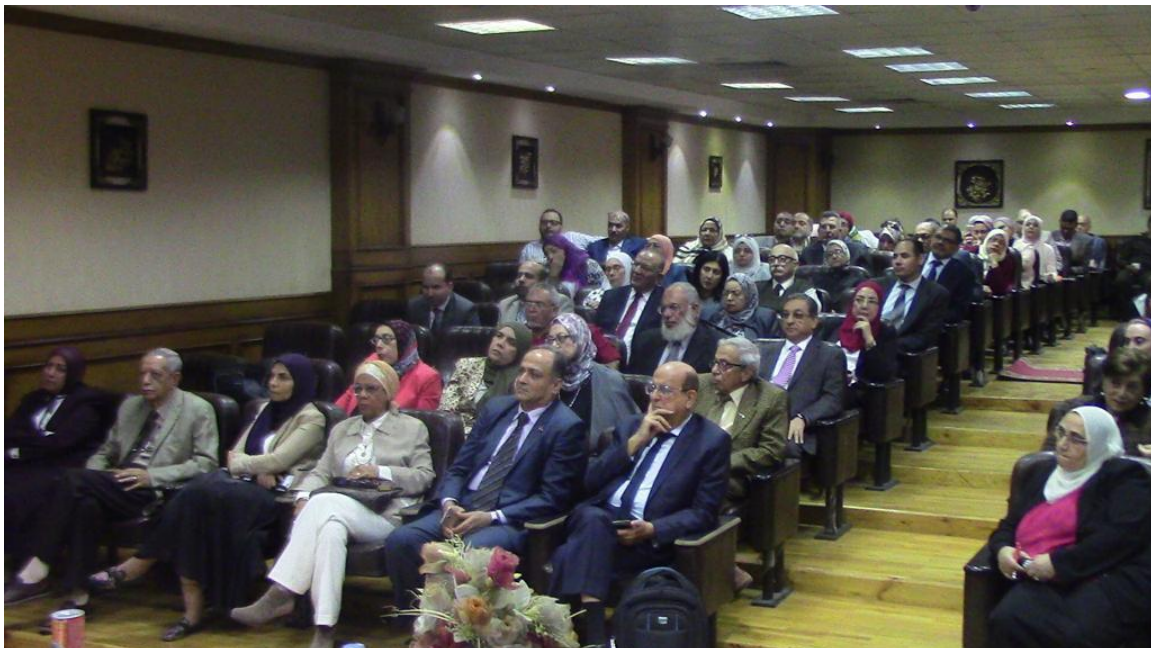

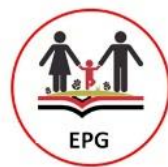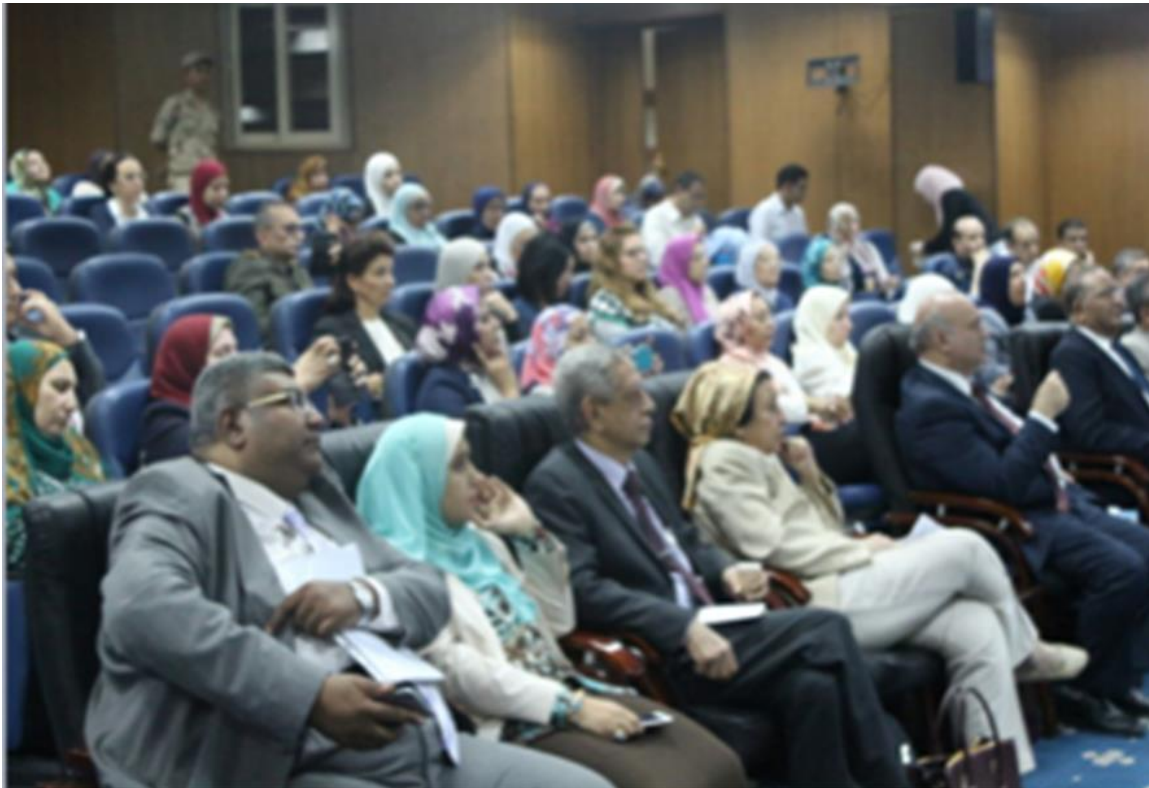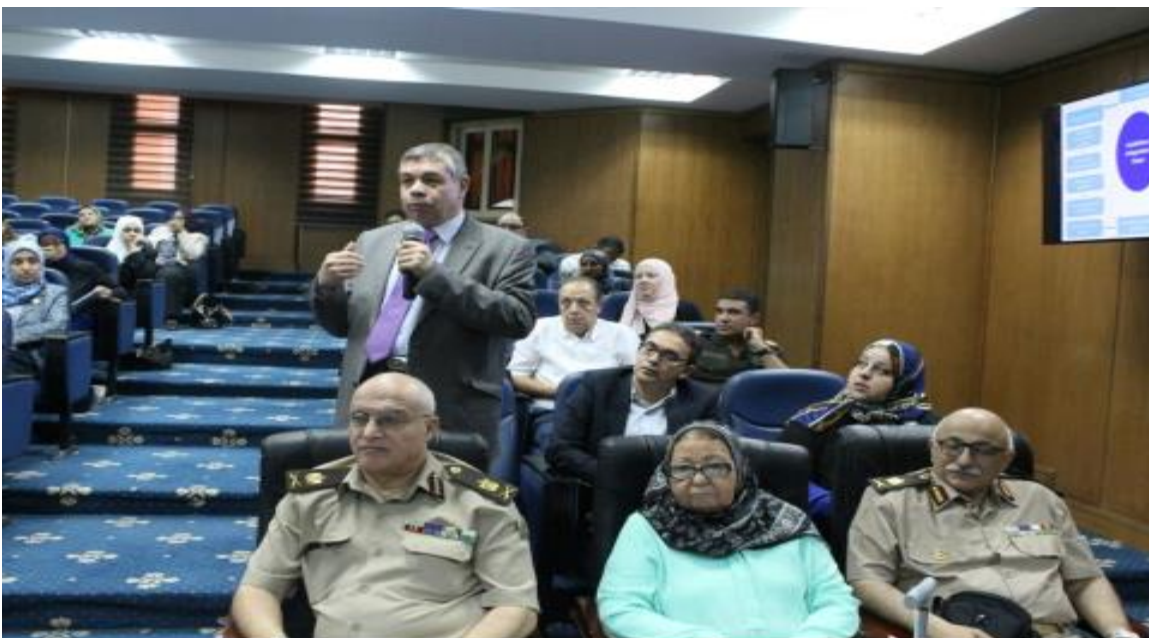



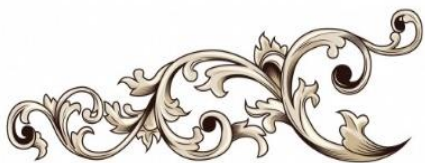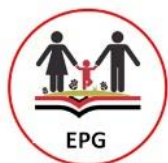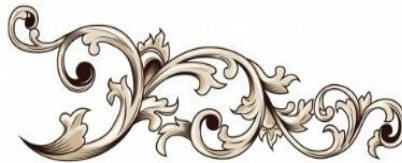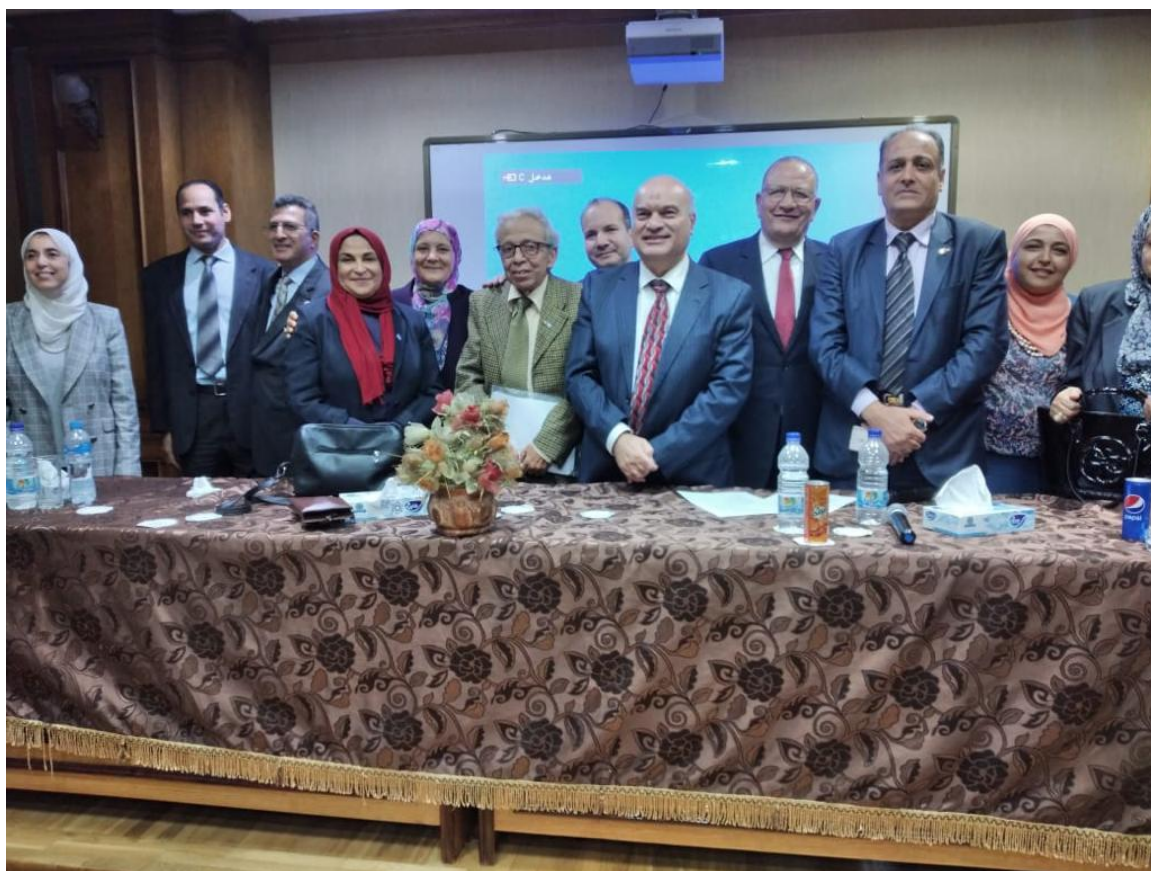

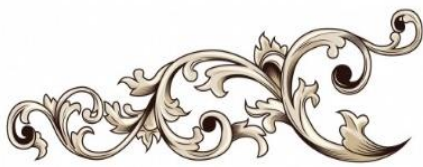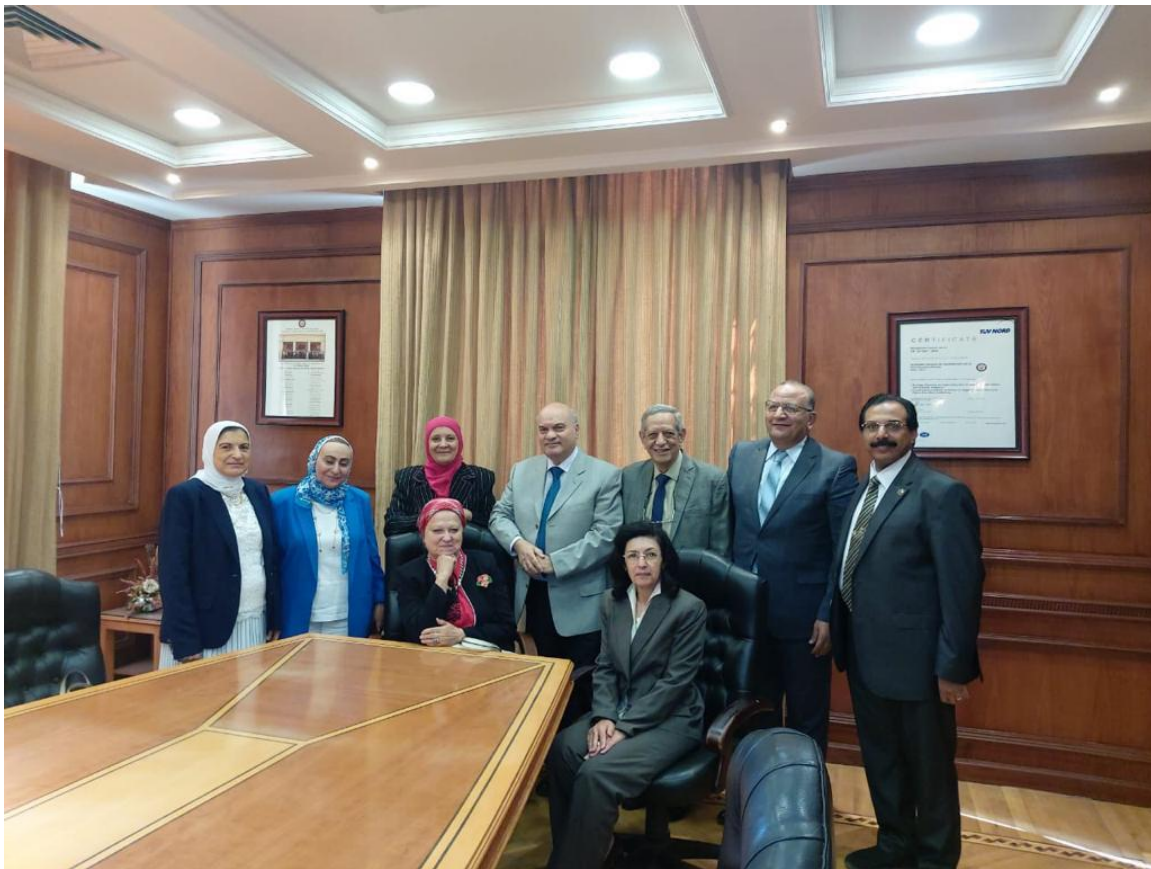



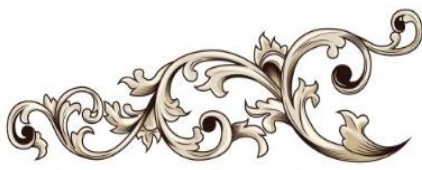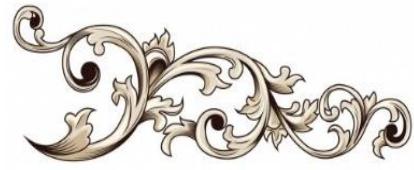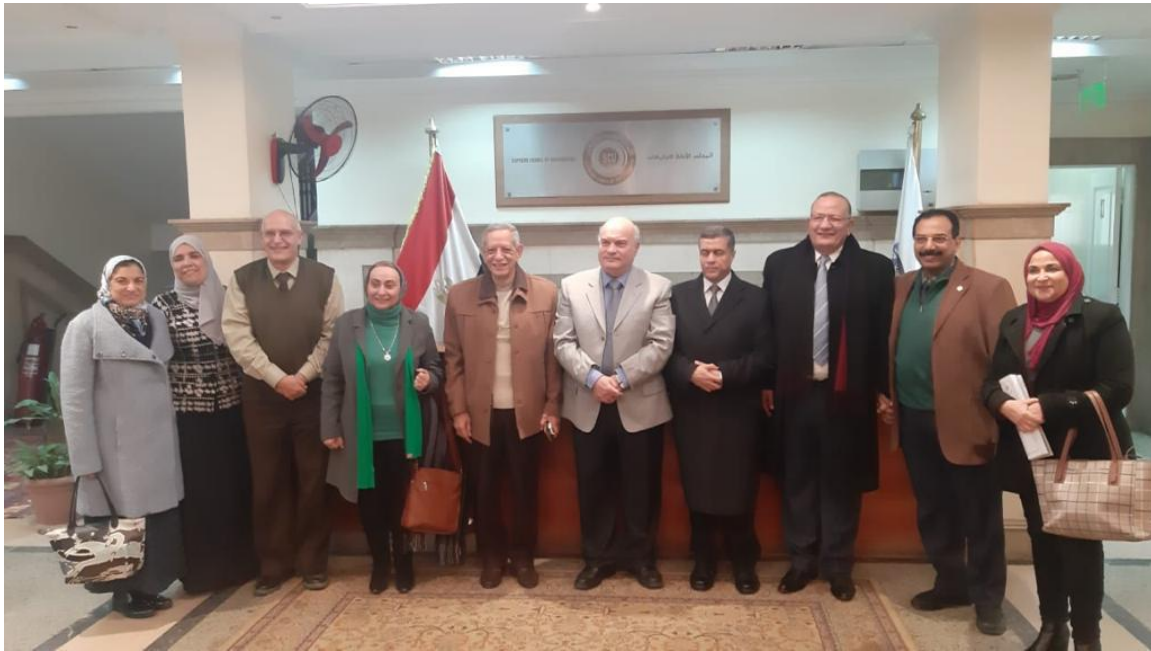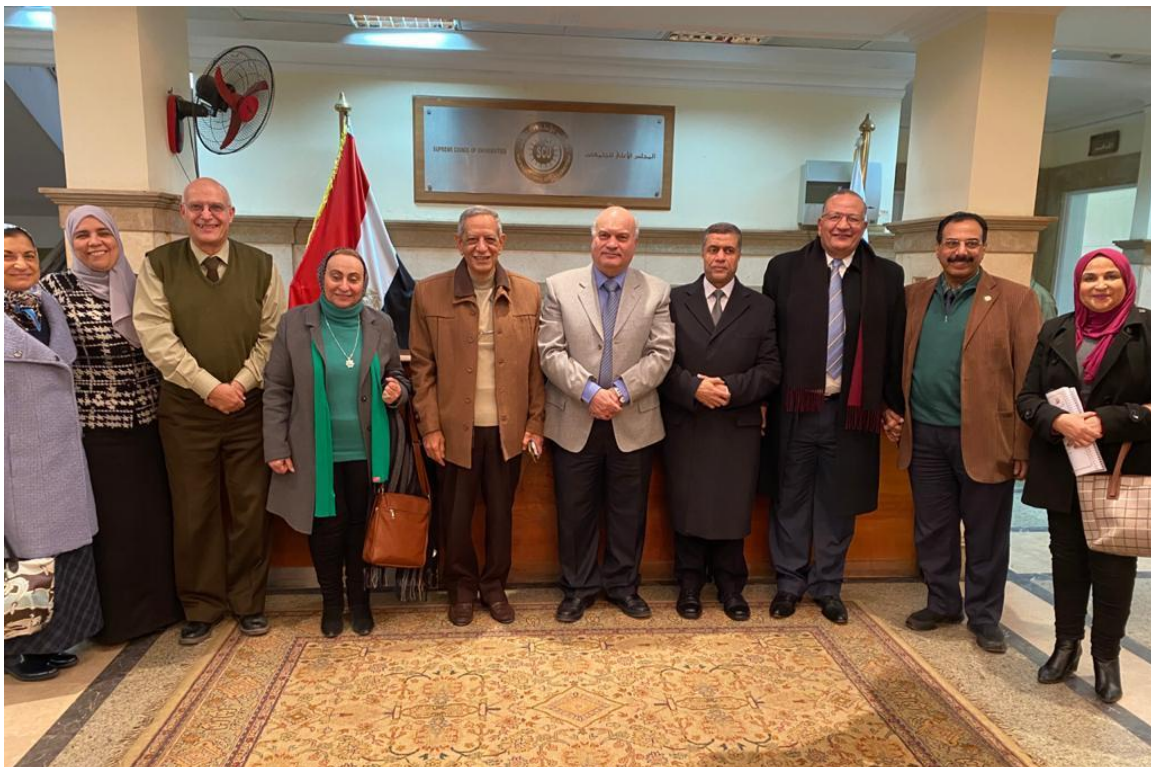



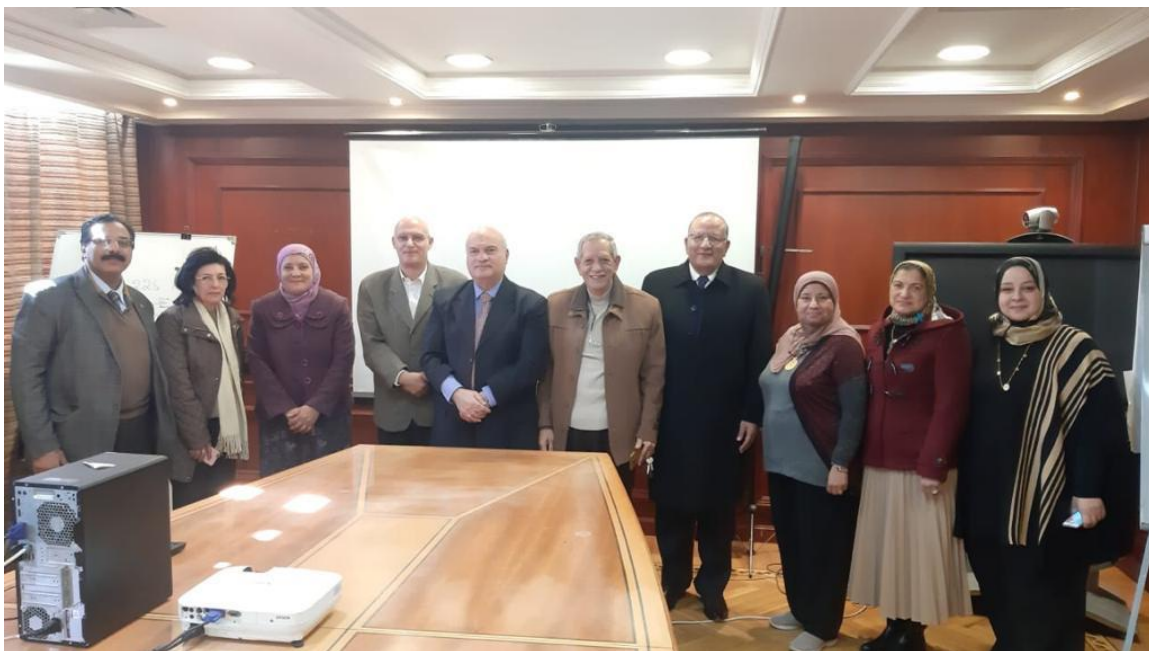

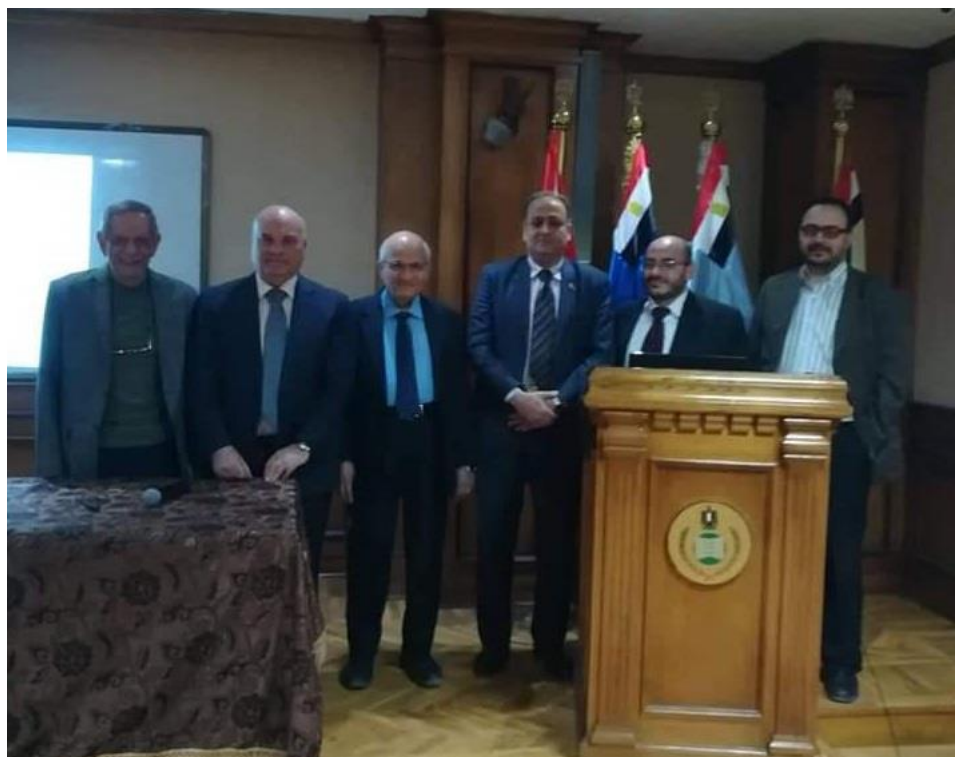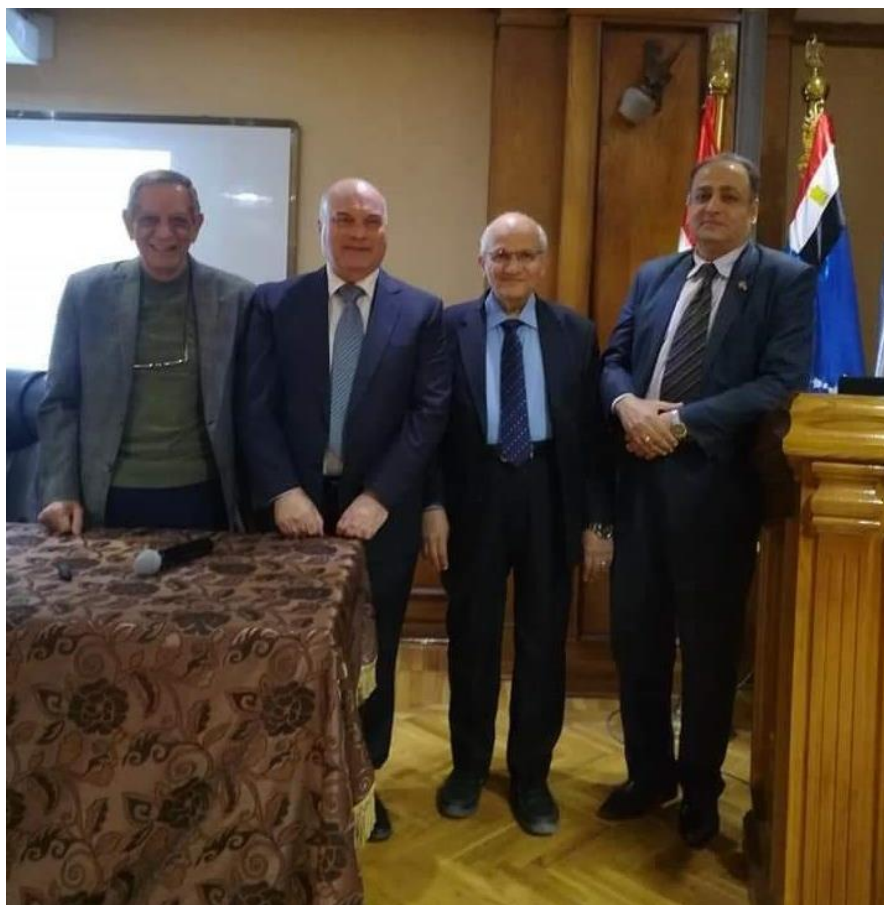



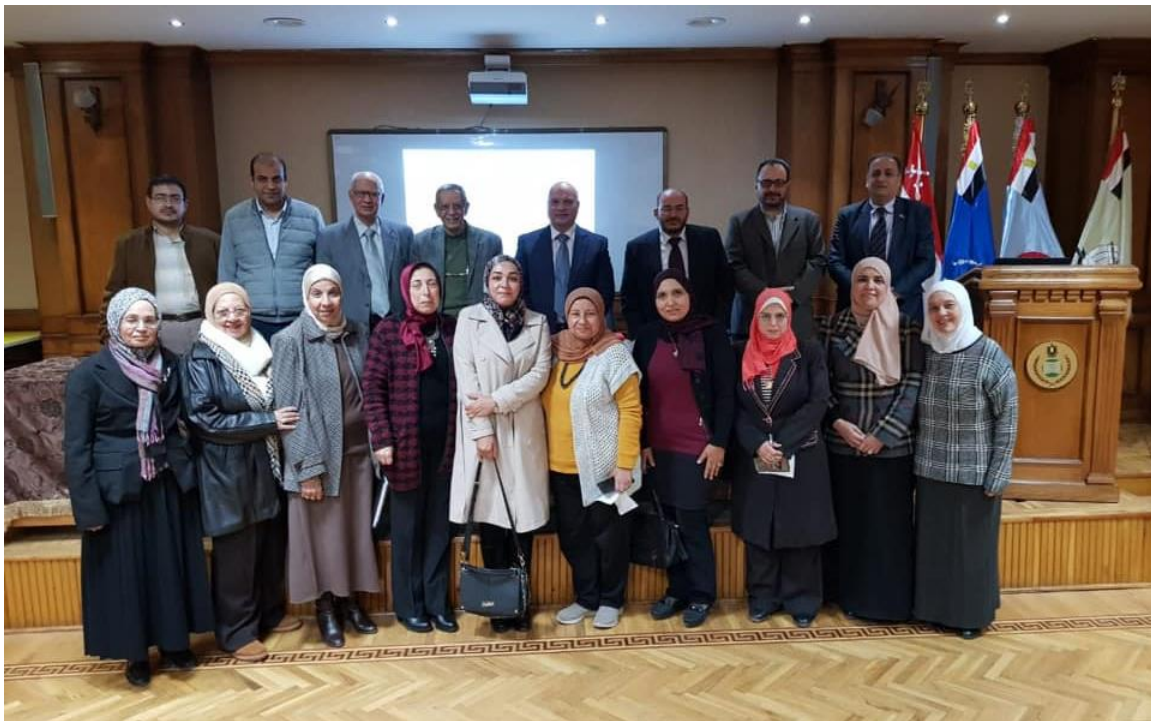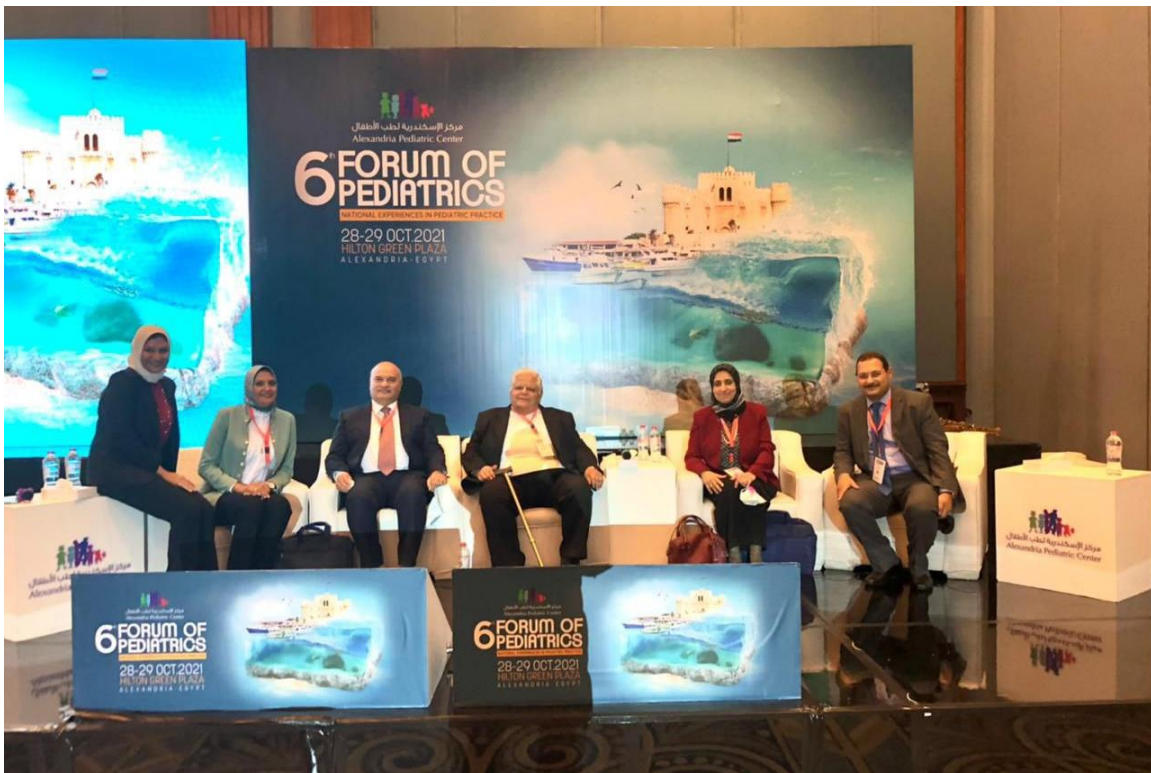

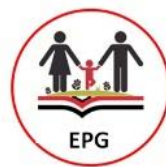

**PHIS**  
**PORTSAID**  
HOSPITALITY GROUP

**EPG**

الكلية الطبية  
جامعة أسيوط  
Faculty of Medicine  
Assiut University

**EGYPTIAN PEDIATRIC  
CLINICAL PRACTICE  
GUIDELINES COMMITTEE**

**WORKSHOP ON  
EGYPTIAN PEDIATRIC  
CLINICAL GUIDELINES  
14<sup>th</sup> FEBRUARY**

[www.facebook.com/AymanAbuElhussin.PH](http://www.facebook.com/AymanAbuElhussin.PH)



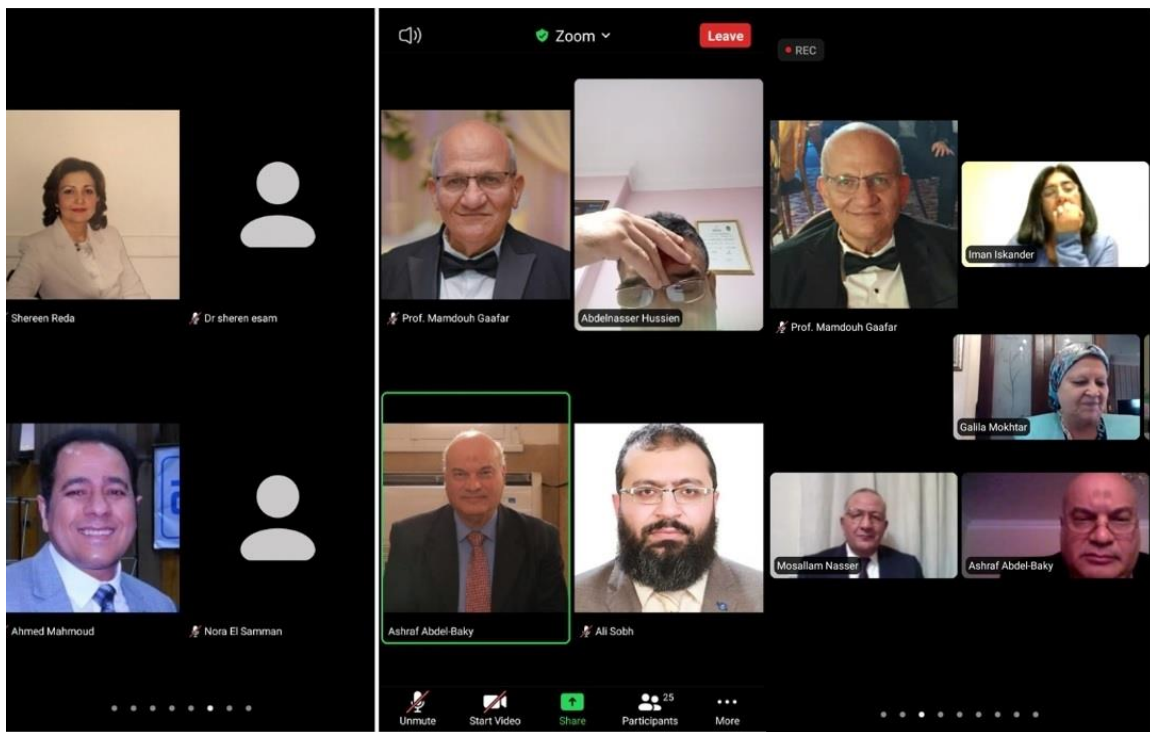

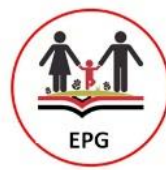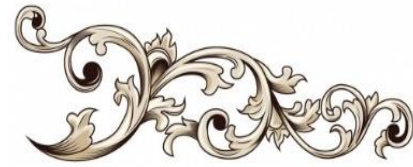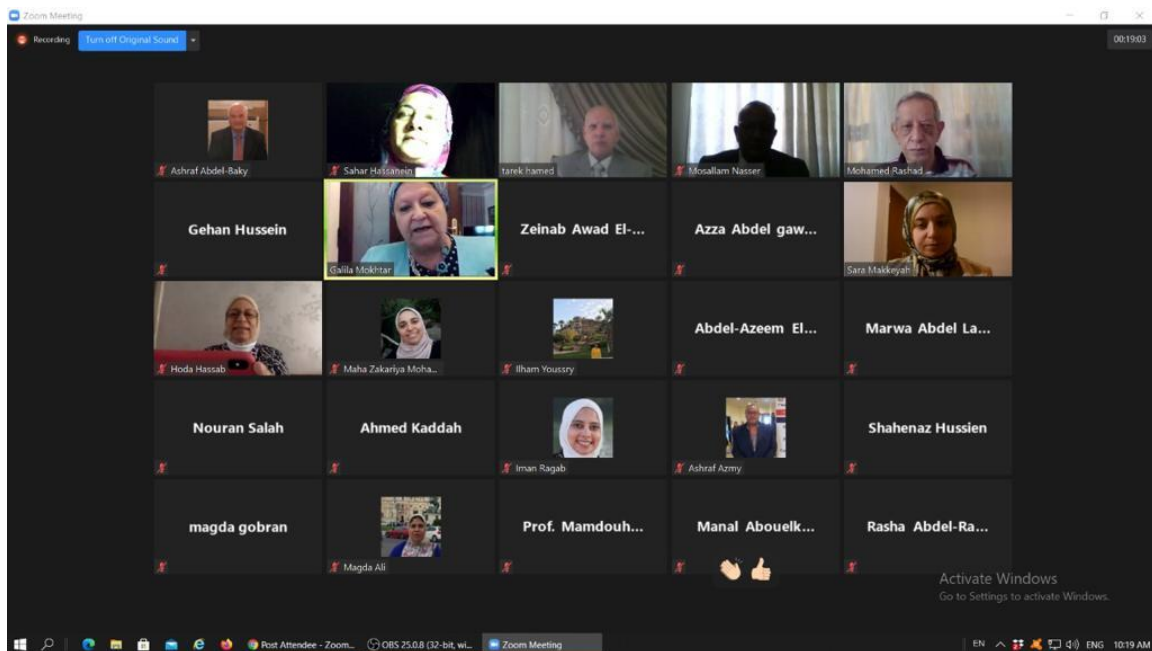



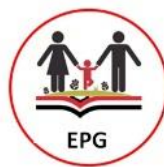

The participation of all Departments of Pediatrics in Egyptian Universities, the National Research Centre, and others were presented at the 2021 Online Guidelines International Network (GIN) Conference

## EGYPTIAN PEDIATRIC CLINICAL PRACTICE GUIDELINES COMMITTEE (EPG)

Established on 21/06/2018























EPG

A national program by the  
EPG was formulated by  
Pediatrics Departments'  
Faculty of 15 Egyptian  
Universities in June 2018.



**GIN**  
Guidelines  
International  
Network



**GIN**  
Guidelines  
International  
Network

## Towards Evidence-Based Pediatrics: A National Clinical Practice Guidelines Program in Egypt

Prof. Ashraf Abdel Baky<sup>1,2</sup>, Prof. Tarek Omar<sup>2,3,4</sup>,  
Dr. Yasser S. Amer<sup>2,3,4,5</sup>

On behalf of the Egyptian Pediatric Clinical Practice Guidelines Committee (EPG)

<sup>1</sup> Pediatrics Department, Faculty of Medicine, Ain Shams University, Cairo, Egypt

<sup>2</sup> Egyptian Pediatric Clinical Practice Guidelines Committee (EPG), Egypt

<sup>3</sup> Pediatrics Department, Faculty of Medicine, Alexandria University, Alexandria, Egypt

<sup>4</sup> Alexandria Center for Evidence-Based Clinical Practice Guidelines, Alexandria University, Egypt

<sup>5</sup> King Saud University Medical City, Riyadh, Saudi Arabia
